# Supplementary material for: The Absoluteness of Semantic Processing: Lessons from the Analysis of Temporal Clusters in Phonemic Verbal Fluency
Source: PubMed Central journal article supplement (PMC4275266; doi:10.1371/journal.pone.0115846), 2014-12-23
Supplement: pone.0115846.s003.pdf [file pone.0115846.s003.pdf]

## Word Relatedness Scores S1

| participant | rating of semantic relatedness |       | phonemic relatedness                |
|-------------|--------------------------------|-------|-------------------------------------|
|             | mean                           | SD    | consecutive words                   |
| VF1         | 0,185                          | 0,557 | 0 Sonne -> Schwein                  |
|             | 0,185                          | 0,786 | 0 Schwein -> Sozialversicherung     |
|             | 0,037                          | 0,192 | 0 Sozialversicherung -> Speisekarte |
|             | 0,074                          | 0,267 | 1 Speisekarte -> Spaßvogel          |
|             | 0,074                          | 0,267 | 0 Spaßvogel -> Saftpresse           |
|             | 0,037                          | 0,192 | 0 Saftpresse -> Suizid              |
|             | 0,630                          | 0,884 | 0 Suizid -> Seelenmassage           |
|             | 0,704                          | 1,031 | 0 Seelenmassage -> Seifenoper       |
|             | 0,074                          | 0,385 | 1 Seifenoper -> Seil                |
|             | 0,037                          | 0,192 | 0 Seil -> Sender                    |
|             | 0,000                          | 0,000 | 1 Sender -> Sellerie                |
|             | 0,037                          | 0,192 | 0 Sellerie -> Sommerreifen          |
|             | 0,185                          | 0,681 | 0 Sommerreifen -> Salat             |
|             | 2,667                          | 1,209 | 0 Salat -> Spinat                   |
|             | 0,444                          | 0,847 | 0 Spinat -> Satsuma                 |
|             | 0,000                          | 0,000 | 0 Satsuma -> Sitz                   |
|             | 3,667                          | 0,620 | 0 Sitz -> Stuhl                     |
|             | 3,333                          | 0,920 | 0 Stuhl -> Sofa                     |
|             | 3,556                          | 0,801 | 0 Sofa -> Sessel                    |
|             | 1,000                          | 1,074 | 0 Sessel -> Seide                   |
|             | 3,444                          | 0,847 | 1 Seide -> Samt                     |
|             | 0,259                          | 0,526 | 0 Samt -> Softdrink                 |
|             | 0,556                          | 0,974 | 0 Softdrink -> schnell              |
|             | 3,556                          | 0,577 | 0 schnell -> spurten                |
|             | 3,741                          | 0,526 | 1 spurten -> Sprint                 |
|             | 0,370                          | 0,926 | 1 Sprint -> Spezialabteilung        |
|             | 0,370                          | 0,742 | 1 Spezialabteilung -> Spender       |
|             | 2,778                          | 1,188 | 1 Spender -> Sponsor                |
|             | 0,333                          | 0,734 | 1 Sponsor -> Sparring               |
|             | 0,037                          | 0,192 | 0 Sparring -> schreiben             |
|             | 0,296                          | 0,669 | 0 schreiben -> stehlen              |
|             | 0,074                          | 0,267 | 1 stehlen -> stehen                 |
|             | 1,926                          | 1,357 | 1 stehen -> Stufe                   |
| VF2         | 0,778                          | 1,121 | 0 Schokolade -> Salbei              |
|             | 1,037                          | 1,192 | 0 Salbei -> Süßigkeiten             |
|             | 2,370                          | 1,182 | 0 Süßigkeiten -> Sahne              |
|             | 1,593                          | 1,366 | 0 Sahne -> Sirup                    |
|             | 0,692                          | 1,158 | 0 Sirup -> Sojamehl                 |
|             | 1,148                          | 1,322 | 0 Sojamehl -> Sauerteig             |
|             | 0,667                          | 1,240 | 0 Sauerteig -> Schnitzel            |
|             | 1,741                          | 1,457 | 0 Schnitzel -> Senf                 |

|       |       |                            |
|-------|-------|----------------------------|
| 0,148 | 0,456 | 1 Senf -> Sägemehl         |
| 0,185 | 0,557 | 0 Sägemehl -> Steckrübe    |
| 0,815 | 1,075 | 0 Steckrübe -> Süßigkeiten |
| 0,111 | 0,424 | 0 Süßigkeiten -> Sänger    |
| 0,370 | 0,742 | 1 Sänger -> Sessel         |
| 3,296 | 0,953 | 0 Sessel -> Sofa           |
| 0,148 | 0,456 | 0 Sofa -> Sägemehl         |
| 0,704 | 0,953 | 0 Sägemehl -> Sand         |
| 0,037 | 0,192 | 0 Sand -> Suppe            |

VF3

|       |       |                                               |
|-------|-------|-----------------------------------------------|
| 0,296 | 0,609 | 0 Straße -> Sau                               |
| 3,778 | 0,641 | 0 Sau -> Schwein                              |
| 0,037 | 0,192 | 0 Schwein -> Stufe                            |
| 1,222 | 1,155 | 0 Stufe -> Sitz                               |
| 0,111 | 0,320 | 0 Sitz -> Sterne                              |
| 0,000 | 0,000 | 1 Sterne -> Stamm                             |
| 0,296 | 0,669 | 1 Stamm -> Straßenbahn                        |
| 3,259 | 0,903 | 0 Straßenbahn -> S-Bahn                       |
| 0,963 | 1,581 | 0 S-Bahn -> Südstern                          |
| 0,111 | 0,577 | 0 Südstern -> Stulle                          |
| 0,074 | 0,385 | 1 Stulle -> Sturheit                          |
| 0,556 | 1,013 | 0 Sturheit -> Seriosität                      |
| 0,037 | 0,192 | 0 Seriosität -> Stecken                       |
| 2,704 | 1,750 | 1 Stecken -> Stab                             |
| 0,222 | 0,577 | 0 Stab -> Singvogel                           |
| 1,111 | 1,121 | 0 Singvogel -> Säbelzähntiger                 |
| 0,000 | 0,000 | 0 Säbelzähntiger -> S-Phon (=Eigenname Handy) |
| 0,000 | 0,000 | 0 S-Phon (=Eigenname Handy) -> Stanniolpapier |
| 0,074 | 0,267 | 1 Stanniolpapier -> Strang                    |
| 0,037 | 0,192 | 0 Strang -> Sabber                            |
| 0,519 | 0,935 | 0 Sabber -> Süßstoff                          |
| 0,000 | 0,000 | 0 Süßstoff -> Sauzahn                         |
| 0,556 | 1,219 | 0 Sauzahn -> Spaten                           |

VF4

|       |       |                    |
|-------|-------|--------------------|
| 0,148 | 0,602 | 1 Sau -> Saft      |
| 0,556 | 0,892 | 1 Saft -> Samen    |
| 0,148 | 0,602 | 1 Samen -> Sage    |
| 0,185 | 0,622 | 0 Sage -> Segel    |
| 2,222 | 1,553 | 1 Segel -> See     |
| 0,333 | 0,784 | 0 See -> Sinn      |
| 0,593 | 0,888 | 1 Sinn -> Sicht    |
| 0,074 | 0,385 | 1 Sicht -> sieben  |
| 0,593 | 1,248 | 1 sieben -> Sinn   |
| 0,148 | 0,602 | 0 Sinn -> Sofa     |
| 0,407 | 0,797 | 1 Sofa -> Sonne    |
| 0,185 | 0,557 | 0 Sonne -> Samurai |
| 0,185 | 0,622 | 1 Samurai -> Salon |
| 0,037 | 0,192 | 0 Salon -> Sud     |

|       |       |                  |
|-------|-------|------------------|
| 0,333 | 0,832 | 0 Sud -> Suff    |
| 0,148 | 0,456 | 1 Suff -> Summe  |
| 0,148 | 0,770 | 1 Summe -> Sumpf |

VF5

|       |       |                         |
|-------|-------|-------------------------|
| 0,444 | 0,751 | 0 Schiff -> Solaranlage |
| 0,000 | 0,000 | 0 Solaranlage -> Semmel |
| 1,148 | 1,199 | 0 Semmel -> Sauce       |
| 2,222 | 1,601 | 0 Sauce -> Suppe        |
| 0,037 | 0,192 | 0 Suppe -> Serenade     |
| 0,000 | 0,000 | 0 Serenade -> Sahne     |
| 0,000 | 0,000 | 0 Sahne -> Surfboard    |
| 0,259 | 0,656 | 0 Surfboard -> Sänger   |
| 0,148 | 0,456 | 0 Sänger -> Sülze       |
| 0,481 | 0,802 | 0 Sülze -> Schimmel     |
| 0,037 | 0,192 | 0 Schimmel -> Sender    |
| 0,037 | 0,192 | 0 Sender -> Seil        |
| 0,000 | 0,000 | 0 Seil -> Selen         |
| 0,000 | 0,000 | 0 Selen -> Ski          |
| 1,074 | 1,439 | 0 Ski -> Schal          |
| 0,037 | 0,192 | 2 Schal -> Schall       |
| 1,000 | 1,359 | 0 Schall -> Schlager    |
| 0,222 | 0,641 | 1 Schlager -> Schluck   |
| 1,038 | 1,148 | 1 Schluck -> Schleim    |

VF6

|       |       |                          |
|-------|-------|--------------------------|
| 0,815 | 1,039 | 0 Sonne -> singen        |
| 0,593 | 0,888 | 0 singen -> Sarg         |
| 0,000 | 0,000 | 0 Sarg -> Steppe         |
| 0,037 | 0,192 | 0 Steppe -> Sirene       |
| 0,259 | 0,712 | 0 Sirene -> Saal         |
| 0,370 | 0,839 | 0 Saal -> summen         |
| 0,296 | 0,609 | 0 summen -> schlucken    |
| 0,000 | 0,000 | 0 schlucken -> schießen  |
| 0,000 | 0,000 | 0 schießen -> schlafen   |
| 0,111 | 0,320 | 1 schlafen -> schlendern |
| 0,074 | 0,385 | 0 schlendern -> Schrank  |
| 0,000 | 0,000 | 0 Schrank -> Schelm      |
| 0,037 | 0,192 | 0 Schelm -> schwimmen    |
| 0,481 | 0,893 | 1 schwimmen -> Schwanz   |
| 0,000 | 0,000 | 0 Schwanz -> Sieger      |
| 0,037 | 0,192 | 0 Sieger -> Schlumpf     |
| 0,000 | 0,000 | 1 Schlumpf -> Schleppe   |
| 0,259 | 0,594 | 1 Schleppe -> schleichen |
| 0,074 | 0,267 | 0 schleichen -> sagen    |
| 2,074 | 1,385 | 1 sagen -> Sage          |
| 0,259 | 0,594 | 0 Sage -> sichern        |
| 2,926 | 1,328 | 0 sichern -> Schloss     |
| 3,630 | 0,742 | 1 Schloss -> schließen   |
| 0,296 | 0,953 | 0 schließen -> schön     |

|       |       |                         |
|-------|-------|-------------------------|
| 0,778 | 1,013 | 0 schön -> schräg       |
| 0,185 | 0,483 | 0 schräg -> schlafen    |
| 0,407 | 0,694 | 1 schlafen -> schlucken |
| 0,000 | 0,000 | 0 schlucken -> Schein   |
| 0,333 | 0,734 | 0 Schein -> Schule      |

VF7

|       |       |                                |
|-------|-------|--------------------------------|
| 0,222 | 0,847 | 0 Sause -> Stafette            |
| 0,148 | 0,456 | 0 Stafette -> Sabine           |
| 0,037 | 0,192 | 0 Sabine -> Sache              |
| 1,074 | 1,107 | 0 Sache -> Sorte               |
| 0,037 | 0,192 | 0 Sorte -> Sakrileg            |
| 0,074 | 0,385 | 0 Sakrileg -> Sortiment        |
| 0,333 | 0,734 | 1 Sortiment -> Sauce           |
| 0,407 | 0,888 | 0 Sauce -> Salbe               |
| 0,074 | 0,385 | 1 Salbe -> Savanne             |
| 0,259 | 0,656 | 0 Savanne -> Sicherheit        |
| 0,296 | 0,669 | 0 Sicherheit -> Subunternehmen |
| 0,000 | 0,000 | 1 Subunternehmen -> Sulky      |
| 0,000 | 0,000 | 1 Sulky -> Summa summarum      |
| 0,000 | 0,000 | 0 Summa summarum -> Saft       |
| 0,333 | 0,920 | 1 Saft -> Sause                |
| 0,037 | 0,192 | 0 Sause -> Staubsauger         |
| 0,000 | 0,000 | 0 Staubsauger -> Silizium      |
| 1,000 | 1,468 | 1 Silizium -> Silikon          |
| 0,037 | 0,192 | 0 Silikon -> Säbel             |
| 0,000 | 0,000 | 0 Säbel -> Sauce               |
| 0,000 | 0,000 | 0 Sauce -> Sakrileg            |
| 0,444 | 0,801 | 1 Sakrileg -> Sarkophag        |
| 0,074 | 0,385 | 1 Sarkophag -> Salmonellen     |
| 0,222 | 0,506 | 0 Salmonellen -> Sense         |
| 0,037 | 0,192 | 0 Sense -> Seismograph         |
| 0,000 | 0,000 | 1 Seismograph -> Seife         |
| 0,038 | 0,196 | 0 Seife -> Solei               |

VF8

|       |       |                          |
|-------|-------|--------------------------|
| 3,370 | 0,792 | 1 Sonne -> Sommer        |
| 0,111 | 0,577 | 0 Sommer -> Silbe        |
| 0,074 | 0,385 | 0 Silbe -> selbige       |
| 3,667 | 1,074 | 1 selbige -> selbige     |
| 0,148 | 0,456 | 0 selbige -> stumm       |
| 0,667 | 1,074 | 1 stumm -> steif         |
| 0,630 | 1,115 | 1 steif -> Stille        |
| 0,778 | 1,013 | 1 Stille -> Strand       |
| 1,741 | 1,607 | 0 Strand -> schön        |
| 0,259 | 0,813 | 2 schön -> schon         |
| 0,000 | 0,000 | 0 schon -> schummeln     |
| 0,000 | 0,000 | 2 schummeln -> schimmeln |
| 0,074 | 0,267 | 0 schimmeln -> Schemel   |
| 0,074 | 0,267 | 0 Schemel -> Scham       |

|       |       |                         |
|-------|-------|-------------------------|
| 3,667 | 0,832 | 0 Scham -> schämen      |
| 0,074 | 0,385 | 0 schämen -> Sage       |
| 2,185 | 1,360 | 1 Sage -> sagen         |
| 0,185 | 0,483 | 1 sagen -> sammeln      |
| 0,259 | 0,594 | 1 sammeln -> sausen     |
| 0,111 | 0,577 | 1 sausen -> Sau         |
| 3,815 | 0,622 | 0 Sau -> Schwein        |
| 1,481 | 1,341 | 1 Schwein -> Schwalbe   |
| 0,074 | 0,267 | 1 Schwalbe -> schwitzen |
| 1,852 | 1,379 | 0 schwitzen -> schmoren |
| 0,370 | 0,792 | 2 schmoren -> schmieren |

#### VF9

|       |       |                           |
|-------|-------|---------------------------|
| 0,481 | 0,849 | 0 Schuster -> Schiffsarzt |
| 0,185 | 0,483 | 0 Schiffsarzt -> Schule   |
| 3,630 | 0,629 | 1 Schule -> Schulhaus     |
| 0,370 | 0,688 | 0 Schulhaus -> schwimmen  |
| 0,111 | 0,424 | 0 schwimmen -> Spaten     |
| 0,000 | 0,000 | 1 Spaten -> sprechen      |
| 1,111 | 1,086 | 1 sprechen -> spielen     |
| 1,148 | 1,292 | 1 spielen -> Sprache      |
| 0,148 | 0,602 | 0 Sprache -> Schutzmantel |
| 0,481 | 1,087 | 0 Schutzmantel -> Schütze |
| 0,074 | 0,267 | 1 Schütze -> Schirmer     |
| 0,000 | 0,000 | 0 Schirmer -> schnell     |
| 0,296 | 0,775 | 0 schnell -> schlecht     |
| 1,370 | 1,621 | 0 schlecht -> Schimmel    |
| 0,231 | 0,587 | 0 Schimmel -> schlafen    |
| 1,704 | 1,382 | 1 schlafen -> schlapp     |
| 1,000 | 1,209 | 1 schlapp -> schlimm      |

#### VF10

|       |       |                             |
|-------|-------|-----------------------------|
| 0,407 | 0,797 | 0 Suizid -> sorglos         |
| 0,148 | 0,456 | 0 sorglos -> Servus         |
| 2,667 | 1,441 | 0 Servus -> Salute          |
| 0,370 | 0,792 | 0 Salute -> Solidarität     |
| 0,148 | 0,602 | 0 Solidarität -> Sakrament  |
| 0,111 | 0,424 | 0 Sakrament -> Sozius       |
| 0,111 | 0,577 | 0 Sozius -> Schwein         |
| 0,074 | 0,267 | 0 Schwein -> sonstwas       |
| 0,037 | 0,192 | 0 sonstwas -> Sahne         |
| 0,259 | 0,764 | 0 Sahne -> sorglos          |
| 0,037 | 0,192 | 0 sorglos -> systematisch   |
| 0,704 | 1,235 | 1 systematisch -> sinngemäß |
| 0,000 | 0,000 | 0 sinngemäß -> Serpentine   |
| 0,111 | 0,320 | 0 Serpentine -> sieben      |
| 0,037 | 0,192 | 0 sieben -> Sabine          |
| 0,074 | 0,267 | 0 Sabine -> Segen           |
| 0,111 | 0,320 | 0 Segen -> sachte           |
| 0,037 | 0,192 | 1 sachte -> Sache           |

|       |       |                                         |
|-------|-------|-----------------------------------------|
| 0,000 | 0,000 | 1 Sache -> Sahib (Marokkanischer Name)  |
| 0,037 | 0,192 | 1 Sahib (Marokkanischer Name) -> seicht |
| 1,407 | 1,217 | 0 seicht -> See                         |
| 0,074 | 0,385 | 0 See -> Saal                           |
| 1,074 | 1,174 | 1 Saal -> Samba                         |
| 0,407 | 0,694 | 0 Samba -> sentimental                  |
| 1,037 | 1,224 | 0 sentimental -> Silvester              |
| 0,148 | 0,362 | 0 Silvester -> strategisch              |
| 0,111 | 0,320 | 1 strategisch -> Stratosphäre           |
| 1,593 | 1,575 | 0 Stratosphäre -> Sonne                 |
| 2,630 | 1,334 | 0 Sonne -> Saturn                       |
| 0,148 | 0,534 | 0 Saturn -> sterben                     |
| 0,185 | 0,622 | 1 sterben -> stehen                     |
| 0,333 | 0,620 | 1 stehen -> Stollen                     |
| 0,222 | 0,641 | 1 Stollen -> Strafe                     |

#### VF11

|       |       |                              |
|-------|-------|------------------------------|
| 0,259 | 0,656 | 0 Schiff -> Schloss          |
| 1,889 | 1,867 | 0 Schloss -> Schlüssel       |
| 0,296 | 0,724 | 0 Schlüssel -> Stand         |
| 1,370 | 1,548 | 1 Stand -> Stau              |
| 0,333 | 1,074 | 0 Stau -> Schwein            |
| 0,222 | 0,506 | 0 Schwein -> Straße          |
| 0,296 | 0,542 | 0 Straße -> Schaufel         |
| 0,630 | 1,115 | 0 Schaufel -> Schraube       |
| 0,074 | 0,267 | 0 Schraube -> Salat          |
| 0,000 | 0,000 | 0 Salat -> Sorge             |
| 1,259 | 1,289 | 0 Sorge -> Sicherheit        |
| 0,593 | 1,118 | 0 Sicherheit -> Sanssouci    |
| 0,704 | 1,203 | 0 Sanssouci -> Soldat        |
| 2,852 | 1,486 | 0 Soldat -> Sergeant         |
| 0,185 | 0,681 | 0 Sergeant -> Sozietät       |
| 0,963 | 1,315 | 1 Sozietät -> Solidarität    |
| 0,148 | 0,534 | 0 Solidarität -> Souffleuse  |
| 2,667 | 1,387 | 0 Souffleuse -> Schauspieler |
| 0,296 | 0,724 | 0 Schauspieler -> Skat       |
| 1,185 | 1,415 | 0 Skat -> Salon              |
| 0,077 | 0,392 | 0 Salon -> Sauce             |

#### VF12

|       |       |                    |
|-------|-------|--------------------|
| 1,000 | 1,209 | 0 Säge -> Schwert  |
| 0,074 | 0,385 | 0 Schwert -> Socke |
| 0,074 | 0,385 | 0 Socke -> sieben  |
| 0,037 | 0,192 | 0 sieben -> seicht |
| 0,074 | 0,385 | 0 seicht -> super  |
| 0,963 | 1,427 | 0 super -> schwer  |
| 0,741 | 1,289 | 0 schwer -> super  |
| 0,815 | 1,388 | 0 super -> sechs   |
| 0,000 | 0,000 | 0 sechs -> sauber  |
| 0,185 | 0,622 | 0 sauber -> Sieg   |

|       |       |                             |
|-------|-------|-----------------------------|
| 0,148 | 0,362 | 0 Sieg -> Schwiele          |
| 0,185 | 0,622 | 0 Schwiele -> Schurke       |
| 0,074 | 0,267 | 0 Schurke -> sedierend      |
| 0,148 | 0,534 | 0 sedierend -> Sud          |
| 0,000 | 0,000 | 2 Sud -> süd                |
| 0,222 | 0,698 | 0 süd -> saufen             |
| 0,481 | 1,014 | 0 saufen -> sehr            |
| 0,185 | 0,622 | 0 sehr -> Schuld            |
| 0,000 | 0,000 | 0 Schuld -> sieben (Verb)   |
| 0,148 | 0,456 | 0 sieben (Verb) -> schweben |

VF13

|       |       |                          |
|-------|-------|--------------------------|
| 0,630 | 0,926 | 1 Sturm -> Stiefel       |
| 0,111 | 0,577 | 1 Stiefel -> Stamm       |
| 0,407 | 0,971 | 1 Stamm -> Stolz         |
| 0,148 | 0,534 | 0 Stolz -> Schienbein    |
| 0,111 | 0,424 | 0 Schienbein -> Schlange |
| 0,111 | 0,320 | 0 Schlange -> Schubkarre |
| 0,444 | 0,847 | 0 Schubkarre -> Scheiße  |
| 0,074 | 0,267 | 0 Scheiße -> Schlinge    |
| 0,963 | 1,480 | 0 Schlinge -> Sturz      |
| 3,000 | 0,832 | 1 Sturz -> stolpern      |
| 0,148 | 0,456 | 0 stolpern -> sagen      |
| 3,407 | 1,047 | 0 sagen -> sprechen      |
| 2,000 | 1,209 | 0 sprechen -> säuseln    |
| 1,444 | 1,281 | 0 säuseln -> singen      |
| 0,074 | 0,385 | 0 singen -> segeln       |
| 0,037 | 0,192 | 0 segeln -> stehlen      |
| 3,481 | 1,122 | 1 stehlen -> stibitzen   |
| 0,111 | 0,320 | 1 stibitzen -> sträuben  |
| 0,074 | 0,385 | 1 sträuben -> Strauch    |
| 0,259 | 0,712 | 1 Strauch -> Strieme     |
| 0,185 | 0,786 | 1 Strieme -> streben     |
| 0,185 | 0,557 | 1 streben -> Sturz       |
| 0,074 | 0,385 | 0 Sturz -> Samen         |
| 3,481 | 0,935 | 1 Samen -> Saat          |
| 0,111 | 0,424 | 0 Saat -> Sud            |
| 1,074 | 1,412 | 0 Sud -> Sieb            |
| 0,074 | 0,385 | 0 Sieb -> Segen          |
| 1,556 | 1,553 | 1 Segen -> Seele         |
| 0,630 | 1,043 | 1 Seele -> Seemann       |
| 0,444 | 0,751 | 0 Seemann -> summen      |
| 1,370 | 1,214 | 0 summen -> sprechen     |
| 0,037 | 0,192 | 1 sprechen -> spiegeln   |
| 0,259 | 0,859 | 1 spiegeln -> spielen    |
| 0,148 | 0,456 | 1 spielen -> Spaten      |
| 0,111 | 0,424 | 1 Spaten -> spät         |
| 0,074 | 0,385 | 1 spät -> Sporen         |
| 0,926 | 1,299 | 0 Sporen -> Säbel        |
| 0,185 | 0,483 | 0 Säbel -> suchen        |

|       |       |                        |
|-------|-------|------------------------|
| 0,185 | 0,622 | 1 suchen -> Substantiv |
| 0,037 | 0,192 | 0 Substantiv -> so     |
| 0,111 | 0,424 | 1 so -> Sole           |
| 0,074 | 0,385 | 0 Sole -> Sport        |
| 1,111 | 1,423 | 1 Sport -> Spitze      |
| 1,259 | 1,430 | 1 Spitze -> Spritze    |
| 0,185 | 0,681 | 1 Spritze -> spannend  |
| 0,222 | 0,698 | 0 spannend -> Schub    |
| 0,185 | 0,786 | 0 Schub -> Schere      |
| 0,000 | 0,000 | 0 Schere -> schade     |
| 0,000 | 0,000 | 0 schade -> Schober    |
| 0,037 | 0,192 | 1 Schober -> schonen   |
| 0,222 | 0,577 | 0 schonen -> Sonne     |
| 0,115 | 0,431 | 0 Sonne -> sieben      |

VF14

|       |       |                                |
|-------|-------|--------------------------------|
| 2,259 | 1,509 | 0 See -> Sand                  |
| 0,519 | 1,122 | 0 Sand -> Stern                |
| 2,815 | 1,415 | 0 Stern -> Sonne               |
| 0,148 | 0,534 | 0 Sonne -> sammeln             |
| 0,148 | 0,456 | 0 sammeln -> sickern           |
| 0,222 | 0,577 | 0 sickern -> suchen            |
| 0,296 | 0,669 | 0 suchen -> Salat              |
| 0,000 | 0,000 | 0 Salat -> Sirene              |
| 0,889 | 1,340 | 0 Sirene -> sausen             |
| 0,037 | 0,192 | 0 sausen -> sortieren          |
| 0,481 | 0,802 | 0 sortieren -> servieren       |
| 0,185 | 0,622 | 0 servieren -> suchen          |
| 0,963 | 1,344 | 1 suchen -> Sucht              |
| 0,000 | 0,000 | 0 Sucht -> Sims                |
| 0,148 | 0,456 | 0 Sims -> Sonaten              |
| 0,037 | 0,192 | 0 Sonaten -> selektieren       |
| 0,000 | 0,000 | 0 selektieren -> summen        |
| 0,000 | 0,000 | 0 summen -> siechen            |
| 0,000 | 0,000 | 0 siechen -> schreiben         |
| 0,259 | 0,594 | 0 schreiben -> Stärke          |
| 0,148 | 0,362 | 0 Stärke -> Schlamm            |
| 1,407 | 1,448 | 1 Schlamm -> Schlieren         |
| 0,000 | 0,000 | 1 Schlieren -> Schlaraffenland |
| 0,556 | 1,050 | 0 Schlaraffenland -> Sofa      |
| 0,037 | 0,192 | 0 Sofa -> Sarkasmus            |

VF15

|       |       |                       |
|-------|-------|-----------------------|
| 0,556 | 1,013 | 0 Stadt -> Sensation  |
| 1,481 | 1,312 | 0 Sensation -> super  |
| 1,333 | 1,687 | 0 super -> sechs      |
| 0,296 | 0,724 | 0 sechs -> Systematik |
| 0,704 | 0,953 | 0 Systematik -> Summe |
| 0,926 | 1,207 | 0 Summe -> Schule     |
| 1,222 | 1,311 | 0 Schule -> Stadt     |



|       |       |                          |
|-------|-------|--------------------------|
| 0,593 | 1,010 | 0 Stadt -> Sensation     |
| 1,444 | 1,450 | 0 Sensation -> super     |
| 0,481 | 1,051 | 0 super -> Schnellstraße |
| 0,037 | 0,192 | 0 Schnellstraße -> Stuhl |
| 0,000 | 0,000 | 0 Stuhl -> Samen         |
| 0,074 | 0,267 | 1 Samen -> Seife         |

VF16

|       |       |                            |
|-------|-------|----------------------------|
| 0,630 | 0,884 | 0 Stau -> schwierig        |
| 2,889 | 1,251 | 1 schwierig -> schwer      |
| 0,407 | 0,844 | 0 schwer -> stammeln       |
| 0,000 | 0,000 | 1 stammeln -> Steuer       |
| 0,148 | 0,602 | 1 Steuer -> Stigma         |
| 0,333 | 0,961 | 1 Stigma -> starr          |
| 0,111 | 0,424 | 0 starr -> selbst          |
| 1,667 | 1,732 | 0 selbst -> süchtig        |
| 0,111 | 0,320 | 0 süchtig -> staunen       |
| 0,037 | 0,192 | 0 staunen -> schwimmen     |
| 0,296 | 0,669 | 0 schwimmen -> schreien    |
| 1,444 | 1,396 | 0 schreien -> spielen      |
| 0,852 | 1,167 | 0 spielen -> schlagen      |
| 0,037 | 0,192 | 0 schlagen -> schwärmen    |
| 0,000 | 0,000 | 0 schwärmen -> stanzen     |
| 0,000 | 0,000 | 1 stanzen -> stolpern      |
| 0,481 | 0,849 | 1 stolpern -> stutzen      |
| 0,000 | 0,000 | 1 stutzen -> stinken       |
| 0,000 | 0,000 | 0 stinken -> schlagen      |
| 1,148 | 1,199 | 1 schlagen -> schleudern   |
| 0,074 | 0,267 | 0 schleudern -> schwimmen  |
| 1,074 | 1,328 | 0 schwimmen -> sauber      |
| 0,741 | 1,095 | 0 sauber -> sehr           |
| 0,704 | 1,203 | 0 sehr -> sagenhaft        |
| 0,741 | 1,196 | 0 sagenhaft -> schrecklich |
| 0,593 | 0,931 | 0 schrecklich -> schlau    |
| 0,407 | 0,888 | 0 schlau -> stur           |
| 0,000 | 0,000 | 0 stur -> Schanze          |
| 0,000 | 0,000 | 0 Schanze -> Schimmel      |
| 0,407 | 0,888 | 0 Schimmel -> Schweiß      |
| 0,222 | 0,801 | 0 Schweiß -> Schlag        |
| 0,000 | 0,000 | 0 Schlag -> spinnen        |
| 0,148 | 0,456 | 0 spinnen -> strecken      |
| 0,185 | 0,483 | 1 strecken -> staunen      |
| 0,259 | 0,656 | 0 staunen -> Schuss        |
| 0,148 | 0,602 | 0 Schuss -> schwitzen      |
| 0,185 | 0,681 | 0 schwitzen -> stürzen     |
| 0,222 | 0,506 | 1 stürzen -> Stab          |
| 0,074 | 0,385 | 1 Stab -> streuen          |
| 0,037 | 0,192 | 0 streuen -> Silber        |
| 0,000 | 0,000 | 0 Silber -> sengen         |
| 0,000 | 0,000 | 0 sengen -> super          |

|       |       |                 |
|-------|-------|-----------------|
| 0,037 | 0,192 | 0 super -> Salz |
| 1,185 | 1,415 | 1 Salz -> Sack  |

VF17

|       |       |                                           |
|-------|-------|-------------------------------------------|
| 0,593 | 0,888 | 0 speziell -> Superlativ                  |
| 0,000 | 0,000 | 1 Superlativ -> Suppe                     |
| 0,074 | 0,385 | 0 Suppe -> Synonym                        |
| 0,074 | 0,385 | 0 Synonym -> Sarg                         |
| 0,037 | 0,192 | 0 Sarg -> sähen                           |
| 0,185 | 0,483 | 3 sähen -> sägen                          |
| 0,333 | 0,734 | 0 sägen -> Sport                          |
| 2,000 | 1,177 | 1 Sport -> spielen                        |
| 1,889 | 1,396 | 1 spielen -> springen                     |
| 0,111 | 0,424 | 0 springen -> sabotieren                  |
| 0,148 | 0,456 | 0 sabotieren -> Stockwerk                 |
| 0,111 | 0,424 | 1 Stockwerk -> Stamm                      |
| 0,259 | 0,656 | 1 Stamm -> Straße                         |
| 0,259 | 0,526 | 1 Straße -> Studio                        |
| 0,111 | 0,577 | 1 Studio -> stagnieren                    |
| 0,593 | 1,083 | 1 stagnieren -> stottern                  |
| 1,222 | 1,281 | 1 stottern -> stolpern                    |
| 0,148 | 0,456 | 1 stolpern -> Strategie                   |
| 0,111 | 0,424 | 1 Strategie -> sterben                    |
| 0,000 | 0,000 | 1 sterben -> stanzen                      |
| 0,370 | 0,792 | 1 stanzen -> stapeln                      |
| 0,407 | 0,844 | 0 stapeln -> schneiden                    |
| 0,519 | 1,051 | 0 schneiden -> Schule                     |
| 0,259 | 0,712 | 0 Schule -> Sonne                         |
| 0,222 | 0,698 | 0 Sonne -> Startfeld                      |
| 0,185 | 0,681 | 1 Startfeld -> Stigma                     |
| 0,185 | 0,786 | 1 Stigma -> stramm                        |
| 0,296 | 0,609 | 0 stramm -> singen                        |
| 1,148 | 1,350 | 0 singen -> saufen                        |
| 0,333 | 0,734 | 0 saufen -> seufzen                       |
| 0,370 | 0,926 | 0 seufzen -> Silbe                        |
| 0,037 | 0,192 | 1 Silbe -> sichern                        |
| 0,593 | 0,931 | 0 sichern -> suchen                       |
| 0,185 | 0,681 | 1 suchen -> super                         |
| 0,185 | 0,681 | 0 super -> sorgen                         |
| 0,000 | 0,000 | 0 sorgen -> spachteln                     |
| 1,593 | 1,526 | 0 spachteln -> schleifen                  |
| 0,852 | 1,350 | 0 schleifen -> spalten                    |
| 1,185 | 1,302 | 0 spalten -> schlagen                     |
| 2,593 | 1,118 | 0 schlagen -> stoßen                      |
| 0,259 | 0,656 | 1 stoßen -> stramm                        |
| 0,185 | 0,483 | 1 stramm -> Stramin (=Stoff zum Sticken)  |
| 2,889 | 1,625 | 1 Stramin (=Stoff zum Sticken) -> sticken |

VF18

|       |       |                     |
|-------|-------|---------------------|
| 0,074 | 0,385 | 0 spielen -> Strauß |
|-------|-------|---------------------|

|       |       |                      |
|-------|-------|----------------------|
| 0,074 | 0,267 | 1 Strauß -> Straße   |
| 0,296 | 0,823 | 1 Straße -> Stock    |
| 1,630 | 1,445 | 1 Stock -> Stein     |
| 0,296 | 0,869 | 1 Stein -> Sturm     |
| 0,074 | 0,385 | 0 Sturm -> Suppe     |
| 0,148 | 0,602 | 0 Suppe -> Sisyphos  |
| 0,037 | 0,192 | 1 Sisyphos -> Sinus  |
| 0,185 | 0,622 | 0 Sinus -> Steige    |
| 1,704 | 1,613 | 2 Steige -> Stiege   |
| 0,037 | 0,192 | 1 Stiege -> Stolz    |
| 0,111 | 0,320 | 1 Stolz -> stehlen   |
| 0,148 | 0,362 | 1 stehlen -> stoppen |
| 0,074 | 0,385 | 1 stoppen -> Stiel   |
| 0,074 | 0,267 | 1 Stiel -> Stoff     |
| 0,370 | 0,742 | 0 Stoff -> Säure     |
| 0,111 | 0,424 | 0 Säure -> Stab      |
| 0,296 | 0,724 | 1 Stab -> stopp      |
| 0,333 | 0,877 | 1 stopp -> stoßen    |
| 0,111 | 0,320 | 0 stoßen -> senil    |
| 0,037 | 0,192 | 0 senil -> Sturm     |
| 1,519 | 1,477 | 0 Sturm -> sausen    |
| 0,074 | 0,267 | 0 sausen -> Stimme   |
| 0,000 | 0,000 | 1 Stimme -> stehlen  |

#### VF19

|       |       |                         |
|-------|-------|-------------------------|
| 0,074 | 0,267 | 0 Schule -> Salz        |
| 0,630 | 0,967 | 1 Salz -> Sand          |
| 0,222 | 0,698 | 0 Sand -> selbständig   |
| 0,704 | 1,103 | 0 selbständig -> Studie |
| 0,667 | 1,240 | 0 Studie -> Sport       |
| 0,630 | 1,079 | 0 Sport -> Stadt        |
| 0,148 | 0,456 | 0 Stadt -> süß          |
| 2,444 | 1,502 | 0 süß -> sauer          |
| 0,074 | 0,385 | 0 sauer -> Socke        |
| 1,630 | 1,471 | 0 Socke -> Schlips      |
| 2,259 | 1,289 | 0 Schlips -> Schal      |
| 0,074 | 0,385 | 0 Schal -> Salz         |
| 0,037 | 0,192 | 0 Salz -> Spott         |
| 0,074 | 0,385 | 0 Spott -> Schuh        |
| 0,037 | 0,192 | 0 Schuh -> Chan         |
| 0,000 | 0,000 | 1 Chan -> Schaden       |
| 0,222 | 0,801 | 0 Schaden -> Suppe      |
| 0,074 | 0,267 | 0 Suppe -> Satire       |
| 0,296 | 0,775 | 0 Satire -> Sofa        |
| 2,852 | 1,231 | 0 Sofa -> Stuhl         |
| 0,111 | 0,424 | 1 Stuhl -> Stoa         |
| 0,333 | 0,734 | 1 Stoa -> Studium       |
| 0,556 | 1,050 | 1 Studium -> Standpunkt |
| 0,148 | 0,534 | 1 Standpunkt -> Strolch |
| 0,148 | 0,534 | 1 Strolch -> Stroh      |

|       |       |                   |
|-------|-------|-------------------|
| 0,111 | 0,424 | 1 Stroh -> Staat  |
| 1,963 | 1,255 | 2 Staat -> Stadt  |
| 0,296 | 0,724 | 1 Stadt -> stetig |
| 0,148 | 0,456 | 0 stetig -> sauer |
| 0,259 | 0,712 | 0 sauer -> Sumpf  |
| 0,037 | 0,192 | 0 Sumpf -> Sonde  |
| 0,000 | 0,000 | 0 Sonde -> sämig  |
| 0,926 | 1,238 | 0 sämig -> Sahne  |
| 0,000 | 0,000 | 0 Sahne -> Spalt  |
| 0,148 | 0,770 | 1 Spalt -> Spleen |

VF20

|       |       |                     |
|-------|-------|---------------------|
| 1,778 | 1,093 | 0 Schnee -> Sonne   |
| 0,000 | 0,000 | 0 Sonne -> Sache    |
| 0,111 | 0,333 | 0 Sache -> süß      |
| 2,667 | 1,414 | 0 süß -> sauer      |
| 0,000 | 0,000 | 0 sauer -> schlafen |
| 1,778 | 1,481 | 0 schlafen -> schön |
| 1,000 | 1,118 | 0 schön -> selten   |
| 0,111 | 0,333 | 0 selten -> Säule   |
| 0,000 | 0,000 | 1 Säule -> Socken   |
| 0,111 | 0,333 | 0 Socken -> Siphon  |
| 0,333 | 0,707 | 1 Siphon -> sicher  |
| 0,444 | 1,014 | 0 sicher -> suchen  |

VF21

|       |       |                                     |
|-------|-------|-------------------------------------|
| 0,556 | 0,882 | 0 Schnee -> Spiegel                 |
| 1,333 | 1,500 | 0 Spiegel -> Seife                  |
| 0,667 | 0,866 | 0 Seife -> Solarium                 |
| 3,556 | 0,726 | 1 Solarium -> Sonne                 |
| 0,667 | 1,000 | 0 Sonne -> Silizium                 |
| 0,000 | 0,000 | 0 Silizium -> Segel                 |
| 0,000 | 0,000 | 0 Segel -> Singular                 |
| 0,000 | 0,000 | 0 Singular -> Sohn                  |
| 2,889 | 1,167 | 0 Sohn -> Schwiegermutter           |
| 0,000 | 0,000 | 0 Schwiegermutter -> Schein         |
| 0,000 | 0,000 | 0 Schein -> Spriegel (=Metallbügel) |
| 0,111 | 0,333 | 0 Spriegel (=Metallbügel) -> Sofa   |
| 3,667 | 0,500 | 0 Sofa -> Sessel                    |
| 0,000 | 0,000 | 0 Sessel -> steil                   |
| 1,778 | 1,394 | 1 steil -> Stiege                   |
| 0,000 | 0,000 | 1 Stiege -> Strafe                  |
| 0,222 | 0,441 | 1 Strafe -> Stellung                |
| 0,000 | 0,000 | 1 Stellung -> steril                |
| 0,000 | 0,000 | 1 steril -> Strom                   |
| 0,333 | 0,707 | 1 Strom -> Steigung                 |
| 0,778 | 1,093 | 1 Steigung -> Stelze                |
| 1,222 | 1,394 | 1 Stelze -> Stiefel                 |
| 0,667 | 0,866 | 1 Stiefel -> Stufe                  |
| 0,222 | 0,667 | 1 Stufe -> Stall                    |

## VF22

|       |       |                          |
|-------|-------|--------------------------|
| 1,000 | 1,118 | 0 Sieg -> Sage           |
| 0,556 | 1,130 | 0 Sage -> Sohn           |
| 0,000 | 0,000 | 0 Sohn -> Sansibar       |
| 0,111 | 0,333 | 0 Sansibar -> singen     |
| 0,778 | 1,093 | 3 singen -> springen     |
| 2,111 | 1,167 | 1 springen -> spielen    |
| 2,667 | 0,866 | 1 spielen -> Sport       |
| 1,778 | 1,563 | 0 Sport -> Schach        |
| 0,667 | 0,866 | 0 Schach -> schwitzen    |
| 1,111 | 1,054 | 0 schwitzen -> Saft      |
| 0,222 | 0,667 | 0 Saft -> Schrank        |
| 1,889 | 1,269 | 0 Schrank -> Stuhl       |
| 3,000 | 0,707 | 0 Stuhl -> Sofa          |
| 0,000 | 0,000 | 0 Sofa -> Segen          |
| 0,222 | 0,441 | 0 Segen -> sicherstellen |

## VF23

|       |       |                                 |
|-------|-------|---------------------------------|
| 2,481 | 1,424 | 0 Schuh -> Schrank              |
| 1,444 | 1,368 | 0 Schrank -> Strumpf            |
| 0,037 | 0,192 | 0 Strumpf -> Schleifpapier      |
| 0,037 | 0,192 | 0 Schleifpapier -> Sonnenbrille |
| 0,444 | 0,751 | 0 Sonnenbrille -> Stiefel       |
| 0,185 | 0,622 | 0 Stiefel -> Sau                |
| 2,148 | 1,379 | 0 Sau -> Stier                  |
| 0,185 | 0,622 | 0 Stier -> Sauberkeit           |
| 2,593 | 1,421 | 0 Sauberkeit -> Schmutz         |
| 2,148 | 1,199 | 0 Schmutz -> Streifen           |
| 3,000 | 1,177 | 1 Streifen -> Striemen          |
| 1,296 | 1,514 | 1 Striemen -> Strapse           |
| 0,370 | 0,926 | 1 Strapse -> stehen             |
| 2,222 | 1,311 | 1 stehen -> Standbild           |
| 1,111 | 1,251 | 1 Standbild -> Status           |
| 1,370 | 1,214 | 0 Status -> Situation           |
| 0,185 | 0,483 | 1 Situation -> Sirene           |
| 0,259 | 0,656 | 0 Sirene -> schlau              |
| 0,889 | 1,121 | 0 schlau -> sicher              |
| 1,185 | 1,272 | 0 sicher -> super               |
| 0,333 | 0,679 | 0 super -> sensibel             |
| 0,111 | 0,424 | 0 sensibel -> Stau              |
| 1,444 | 1,281 | 0 Stau -> schlimm               |
| 0,407 | 1,010 | 1 schlimm -> schlau             |
| 0,037 | 0,192 | 0 schlau -> Sichel              |
| 0,815 | 1,145 | 1 Sichel -> Silber              |
| 0,667 | 0,920 | 0 Silber -> Samt                |
| 0,148 | 0,602 | 0 Samt -> Supermarkt            |
| 0,000 | 0,000 | 0 Supermarkt -> Silbe           |
| 0,037 | 0,192 | 0 Silbe -> Sturm                |
| 0,111 | 0,424 | 0 Sturm -> Salbe                |

|       |       |                      |
|-------|-------|----------------------|
| 1,111 | 1,219 | 1 Salbe -> Salbei    |
| 0,111 | 0,424 | 0 Salbei -> Suche    |
| 0,222 | 0,577 | 0 Suche -> schwimmen |
| 0,074 | 0,267 | 0 schwimmen -> Stift |
| 1,963 | 1,400 | 0 Stift -> Schablone |
| 0,370 | 0,742 | 0 Schablone -> Stein |
| 1,519 | 1,477 | 1 Stein -> Stock     |
| 1,556 | 1,423 | 1 Stock -> stabil    |

#### VF24

|       |       |                        |
|-------|-------|------------------------|
| 0,038 | 0,196 | 1 Sonne -> Sauce       |
| 0,074 | 0,267 | 0 Sauce -> Schein      |
| 1,259 | 1,403 | 0 Schein -> Silber     |
| 0,074 | 0,267 | 0 Silber -> Sud        |
| 0,630 | 1,149 | 0 Sud -> Sahne         |
| 0,556 | 1,013 | 0 Sahne -> Säure       |
| 0,074 | 0,385 | 0 Säure -> sinken      |
| 1,963 | 1,400 | 2 sinken -> senken     |
| 0,519 | 0,975 | 0 senken -> schnell    |
| 0,148 | 0,534 | 0 schnell -> Scheiße   |
| 0,148 | 0,534 | 0 Scheiße -> sind      |
| 0,185 | 0,557 | 0 sind -> suchen       |
| 2,111 | 1,281 | 0 suchen -> sondieren  |
| 1,296 | 1,265 | 0 sondieren -> sammeln |
| 0,148 | 0,456 | 0 sammeln -> Seuche    |
| 0,148 | 0,456 | 0 Seuche -> Sinnbild   |
| 0,222 | 0,641 | 0 Sinnbild -> Summe    |
| 0,037 | 0,192 | 0 Summe -> Samen       |
| 0,037 | 0,192 | 0 Samen -> System      |

#### VF25

|       |       |                         |
|-------|-------|-------------------------|
| 0,185 | 0,622 | 0 Schwein -> Stadt      |
| 0,630 | 0,926 | 0 Stadt -> spielen      |
| 0,296 | 0,669 | 0 spielen -> Sau        |
| 0,481 | 0,893 | 0 Sau -> Suppe          |
| 2,963 | 1,160 | 0 Suppe -> speisen      |
| 1,222 | 1,502 | 0 speisen -> super      |
| 1,185 | 1,520 | 0 super -> Spaghetti    |
| 0,185 | 0,396 | 0 Spaghetti -> Säure    |
| 1,370 | 1,418 | 0 Säure -> Sprudel      |
| 0,111 | 0,320 | 0 Sprudel -> Salbei     |
| 0,000 | 0,000 | 1 Salbei -> sausen      |
| 1,481 | 1,189 | 0 sausen -> springen    |
| 1,667 | 1,330 | 0 springen -> schwimmen |
| 0,704 | 1,325 | 0 schwimmen -> Spitze   |
| 0,111 | 0,424 | 0 Spitze -> surreal     |
| 0,000 | 0,000 | 0 surreal -> Speer      |
| 0,074 | 0,267 | 0 Speer -> Sieb         |
| 0,296 | 0,669 | 0 Sieb -> schwer        |
| 0,222 | 0,698 | 0 schwer -> Spritze     |

|       |       |                         |
|-------|-------|-------------------------|
| 0,630 | 1,149 | 0 Spritze -> Saboteur   |
| 0,000 | 0,000 | 1 Saboteur -> seicht    |
| 0,074 | 0,267 | 0 seicht -> sprechen    |
| 3,407 | 1,010 | 0 sprechen -> schwatzen |
| 0,148 | 0,456 | 0 schwatzen -> sinken   |
| 0,148 | 0,602 | 0 sinken -> Satzung     |
| 0,000 | 0,000 | 1 Satzung -> Seide      |
| 0,111 | 0,424 | 0 Seide -> Staudamm     |
| 0,296 | 0,669 | 1 Staudamm -> Stück     |
| 0,037 | 0,192 | 1 Stück -> Star         |
| 0,556 | 1,050 | 1 Star -> stumm         |

#### VF26

|       |       |                              |
|-------|-------|------------------------------|
| 0,481 | 1,014 | 0 Sonne -> Schule            |
| 1,185 | 1,241 | 0 Schule -> schwimmen        |
| 3,037 | 1,224 | 0 schwimmen -> Strand        |
| 2,333 | 1,209 | 0 Strand -> Sandkasten       |
| 0,444 | 1,013 | 0 Sandkasten -> Straße       |
| 0,963 | 1,126 | 0 Straße -> Schatten         |
| 1,704 | 1,564 | 0 Schatten -> suchen         |
| 2,037 | 1,427 | 0 suchen -> sortieren        |
| 0,037 | 0,192 | 0 sortieren -> Sandmännchen  |
| 0,000 | 0,000 | 0 Sandmännchen -> sondieren  |
| 0,037 | 0,192 | 0 sondieren -> Stuhl         |
| 0,370 | 0,792 | 0 Stuhl -> Spüle             |
| 0,407 | 0,797 | 0 Spüle -> Stehlampe         |
| 0,074 | 0,267 | 0 Stehlampe -> Sprudelwasser |

#### VF27

|       |       |                         |
|-------|-------|-------------------------|
| 0,259 | 0,712 | 0 Sonne -> Seide        |
| 0,074 | 0,385 | 1 Seide -> Sand         |
| 2,074 | 1,615 | 0 Sand -> Sturm         |
| 0,222 | 0,577 | 1 Sturm -> Ständer      |
| 0,000 | 0,000 | 0 Ständer -> Sage       |
| 0,037 | 0,192 | 0 Sage -> Straße        |
| 0,222 | 0,506 | 1 Straße -> Stamm       |
| 0,259 | 0,447 | 1 Stamm -> Strand       |
| 0,852 | 1,134 | 0 Strand -> Schutz      |
| 0,037 | 0,192 | 0 Schutz -> schon       |
| 0,037 | 0,192 | 0 schon -> Sieg         |
| 0,037 | 0,192 | 0 Sieg -> steif         |
| 0,037 | 0,192 | 1 steif -> strahlen     |
| 0,185 | 0,483 | 1 strahlen -> stehen    |
| 1,222 | 1,188 | 1 stehen -> straucheln  |
| 0,333 | 0,679 | 0 straucheln -> schauen |
| 0,407 | 0,888 | 0 schauen -> senden     |
| 0,000 | 0,000 | 0 senden -> Sau         |
| 0,000 | 0,000 | 0 Sau -> Silber         |
| 0,259 | 0,594 | 0 Silber -> Schund      |
| 0,407 | 0,844 | 0 Schund -> schön       |

|       |       |                         |
|-------|-------|-------------------------|
| 0,148 | 0,456 | 0 schön -> Standard     |
| 0,000 | 0,000 | 1 Standard -> strullern |
| 0,148 | 0,362 | 0 strullern -> Spiel    |
| 0,000 | 0,000 | 0 Spiel -> Sülze        |
| 0,000 | 0,000 | 0 Sülze -> Summe        |
| 0,037 | 0,192 | 0 Summe -> sondern      |
| 0,037 | 0,192 | 0 sondern -> Sinn       |
| 0,259 | 0,594 | 1 Sinn -> Sünde         |

VF28

|       |       |                           |
|-------|-------|---------------------------|
| 1,407 | 1,394 | 0 Sieg -> Schütze         |
| 0,000 | 0,000 | 0 Schütze -> Saft         |
| 0,074 | 0,267 | 0 Saft -> Schiff          |
| 0,074 | 0,267 | 0 Schiff -> Salat         |
| 0,000 | 0,000 | 0 Salat -> Schreiber      |
| 0,037 | 0,192 | 1 Schreiber -> schreien   |
| 0,481 | 1,014 | 0 schreien -> S-Bahn      |
| 0,222 | 0,577 | 0 S-Bahn -> Sport         |
| 0,037 | 0,192 | 0 Sport -> Siegelring     |
| 0,074 | 0,267 | 0 Siegelring -> Socken    |
| 1,481 | 1,341 | 0 Socken -> Stirnband     |
| 1,593 | 1,421 | 0 Stirnband -> Sweatshirt |
| 0,370 | 0,792 | 0 Sweatshirt -> suchen    |
| 0,741 | 0,984 | 0 suchen -> Schalter      |
| 0,370 | 0,742 | 0 Schalter -> Stempel     |
| 1,148 | 1,231 | 1 Stempel -> Stift        |
| 0,111 | 0,320 | 0 Stift -> Signal         |
| 1,481 | 1,602 | 0 Signal -> Stärke        |
| 0,296 | 0,669 | 1 Stärke -> stumpf        |
| 0,185 | 0,622 | 0 stumpf -> sorgen        |
| 0,259 | 0,712 | 0 sorgen -> stinken       |

VF29

|       |       |                              |
|-------|-------|------------------------------|
| 0,741 | 1,059 | 0 Sonne -> singen            |
| 0,074 | 0,385 | 0 singen -> Siechtum         |
| 0,074 | 0,267 | 0 Siechtum -> schwingen      |
| 0,481 | 0,849 | 0 schwingen -> sauber machen |
| 0,370 | 0,926 | 0 sauber machen -> sitzen    |
| 2,556 | 1,340 | 0 sitzen -> stehen           |
| 0,296 | 0,823 | 0 stehen -> sabbern          |
| 0,593 | 1,010 | 0 sabbern -> seuseln         |
| 0,074 | 0,385 | 0 seuseln -> schwimmen       |
| 0,815 | 1,241 | 0 schwimmen -> schön         |
| 0,889 | 1,340 | 0 schön -> Schnee            |
| 0,000 | 0,000 | 0 Schnee -> siebzig          |
| 1,296 | 1,564 | 0 siebzig -> senil           |
| 0,259 | 0,656 | 0 senil -> selten            |
| 0,037 | 0,192 | 1 selten -> Sätze            |
| 1,741 | 1,701 | 0 Sätze -> Sinn              |
| 0,296 | 0,724 | 0 Sinn -> selten             |



|       |       |                   |
|-------|-------|-------------------|
| 0,630 | 1,182 | 0 selten -> super |
| 2,111 | 1,450 | 0 super -> sehr   |
| 0,815 | 1,272 | 0 sehr -> so      |
| 0,593 | 1,152 | 1 so -> soll      |

VF30

|       |       |                                 |
|-------|-------|---------------------------------|
| 2,741 | 1,403 | 0 Sauer -> Säure                |
| 0,074 | 0,267 | 1 Säure -> Sonne                |
| 2,630 | 1,363 | 0 Sonne -> Süden                |
| 0,000 | 0,000 | 1 Süden -> sieben               |
| 0,111 | 0,320 | 1 sieben -> süß                 |
| 0,037 | 0,192 | 0 süß -> sechs                  |
| 0,000 | 0,000 | 0 sechs -> Straße               |
| 0,111 | 0,320 | 1 Straße -> Stuhl               |
| 0,037 | 0,192 | 1 Stuhl -> staunen              |
| 0,037 | 0,192 | 1 staunen -> Stunde             |
| 0,148 | 0,456 | 1 Stunde -> steppen             |
| 0,000 | 0,000 | 0 steppen -> Sache              |
| 0,556 | 0,934 | 0 Sache -> sehen                |
| 0,667 | 1,074 | 0 sehen -> sitzen               |
| 0,259 | 0,656 | 0 sitzen -> suchen              |
| 0,148 | 0,456 | 0 suchen -> Sippe               |
| 0,222 | 0,577 | 0 Sippe -> Seuche               |
| 0,185 | 0,557 | 0 Seuche -> schlafen            |
| 0,519 | 0,975 | 0 schlafen -> Schnupfen         |
| 3,370 | 0,688 | 1 Schnupfen -> schniefen        |
| 0,037 | 0,192 | 0 schniefen -> schlau           |
| 0,593 | 1,083 | 1 schlau -> Schlupfwinkel       |
| 0,593 | 0,931 | 1 Schlupfwinkel -> Schlupfwespe |

VF31

|       |       |                     |
|-------|-------|---------------------|
| 0,333 | 0,784 | 0 Streit -> sehen   |
| 0,333 | 0,620 | 0 sehen -> speisen  |
| 0,111 | 0,320 | 0 speisen -> sollen |
| 0,148 | 0,362 | 0 sollen -> schon   |
| 0,000 | 0,000 | 0 schon -> Schirm   |
| 0,000 | 0,000 | 0 Schirm -> Schote  |
| 0,037 | 0,192 | 0 Schote -> Schal   |
| 0,148 | 0,534 | 0 Schal -> Schein   |
| 0,074 | 0,385 | 0 Schein -> Sturm   |
| 0,074 | 0,267 | 0 Sturm -> Sache    |
| 0,148 | 0,456 | 0 Sache -> Sieg     |
| 0,111 | 0,424 | 0 Sieg -> starr     |
| 0,593 | 1,047 | 1 starr -> Stau     |
| 0,259 | 0,712 | 2 Stau -> Stahl     |
| 0,741 | 0,944 | 2 Stahl -> Stuhl    |
| 0,481 | 0,893 | 0 Stuhl -> Sonne    |
| 0,259 | 0,656 | 0 Sonne -> Samt     |
| 2,963 | 1,160 | 1 Samt -> Seide     |
| 0,074 | 0,267 | 0 Seide -> anders   |

|       |       |                         |
|-------|-------|-------------------------|
| 0,630 | 1,149 | 1 sondern -> sondern    |
| 0,074 | 0,267 | 0 sondern -> sehen      |
| 3,704 | 0,609 | 0 sehen -> schauen      |
| 0,074 | 0,267 | 0 schauen -> Samen      |
| 0,222 | 0,641 | 0 Samen -> sieben       |
| 1,444 | 1,625 | 0 sieben -> Sachen      |
| 0,074 | 0,267 | 0 Sachen -> Steige      |
| 0,037 | 0,192 | 0 Steige -> Sahne       |
| 1,519 | 1,477 | 0 Sahne -> Suppe        |
| 0,222 | 0,641 | 0 Suppe -> Sole         |
| 0,074 | 0,385 | 0 Sole -> schieben      |
| 0,222 | 0,577 | 0 schieben -> scheiden  |
| 0,074 | 0,267 | 0 scheiden -> Schräge   |
| 0,222 | 0,506 | 0 Schräge -> schaben    |
| 0,037 | 0,192 | 0 schaben -> scheißen   |
| 0,000 | 0,000 | 0 scheißen -> schonen   |
| 0,370 | 0,884 | 0 schonen -> schnell    |
| 0,259 | 0,712 | 0 schnell -> chic       |
| 0,148 | 0,456 | 0 chic -> Schablone     |
| 0,111 | 0,424 | 0 Schablone -> Schopf   |
| 0,111 | 0,424 | 0 Schopf -> Sargnagel   |
| 0,000 | 0,000 | 0 Sargnagel -> Suffix   |
| 0,000 | 0,000 | 0 Suffix -> Schal       |
| 0,037 | 0,192 | 0 Schal -> Sprühflasche |

VF32

|       |       |                        |
|-------|-------|------------------------|
| 0,333 | 0,784 | 0 Sonne -> Seife       |
| 0,222 | 0,847 | 0 Seife -> Sauce       |
| 0,000 | 0,000 | 0 Sauce -> sind        |
| 0,000 | 0,000 | 0 sind -> Sahne        |
| 0,222 | 0,641 | 0 Sahne -> Stiel       |
| 0,222 | 0,698 | 1 Stiel -> Strafe      |
| 0,296 | 0,724 | 1 Strafe -> Stuhl      |
| 0,852 | 1,231 | 1 Stuhl -> Strand      |
| 0,185 | 0,557 | 1 Strand -> Striemen   |
| 0,037 | 0,192 | 0 Striemen -> Schrank  |
| 0,778 | 1,155 | 0 Schrank -> Schal     |
| 0,222 | 0,641 | 0 Schal -> Schule      |
| 0,370 | 0,792 | 0 Schule -> Schiff     |
| 0,185 | 0,557 | 2 Schiff -> Schaf      |
| 0,074 | 0,385 | 0 Schaf -> Schiene     |
| 0,000 | 0,000 | 1 Schiene -> Schimmel  |
| 0,185 | 0,483 | 1 Schimmel -> schinden |
| 0,074 | 0,267 | 0 schinden -> suhlen   |
| 0,000 | 0,000 | 1 suhlen -> Summe      |
| 0,074 | 0,267 | 0 Summe -> sinken      |
| 0,148 | 0,456 | 1 sinken -> singen     |
| 0,000 | 0,000 | 0 singen -> Siegel     |
| 0,037 | 0,192 | 1 Siegel -> Sieb       |
| 0,815 | 1,145 | 1 Sieb -> sickern      |

|       |       |                        |
|-------|-------|------------------------|
| 0,222 | 0,641 | 0 sickern -> Salbe     |
| 0,148 | 0,456 | 1 Salbe -> Samen       |
| 0,037 | 0,192 | 0 Samen -> Segel       |
| 0,519 | 0,975 | 0 Segel -> Seide       |
| 0,037 | 0,192 | 0 Seide -> sollen      |
| 0,333 | 0,734 | 0 sollen -> spielen    |
| 0,333 | 0,620 | 1 spielen -> sputen    |
| 0,259 | 0,594 | 1 sputen -> sparen     |
| 0,111 | 0,320 | 1 sparen -> spiegeln   |
| 0,185 | 0,557 | 1 spiegeln -> springen |
| 0,111 | 0,424 | 1 springen -> Spange   |
| 0,148 | 0,456 | 1 Spange -> Sprung     |
| 0,111 | 0,424 | 0 Sprung -> summen     |
| 0,000 | 0,000 | 0 summen -> Saft       |
| 0,000 | 0,000 | 0 Saft -> schraffieren |

### VF33

|       |       |                           |
|-------|-------|---------------------------|
| 2,630 | 1,214 | 0 schlafen -> Sofa        |
| 0,111 | 0,424 | 0 Sofa -> saugen          |
| 0,852 | 1,199 | 0 saugen -> süß           |
| 0,370 | 0,792 | 0 süß -> Schnecke         |
| 0,037 | 0,192 | 0 Schnecke -> sieben      |
| 0,000 | 0,000 | 0 sieben -> Sakko         |
| 0,333 | 0,784 | 0 Sakko -> Sofa           |
| 0,037 | 0,192 | 1 Sofa -> Sonnenblume     |
| 0,037 | 0,192 | 0 Sonnenblume -> sagen    |
| 0,000 | 0,000 | 0 sagen -> Sauce          |
| 0,185 | 0,622 | 0 Sauce -> super          |
| 0,222 | 0,641 | 0 super -> schräg         |
| 1,889 | 1,450 | 0 schräg -> schrullig     |
| 0,074 | 0,385 | 0 schrullig -> Schokolade |
| 0,037 | 0,192 | 0 Schokolade -> Sense     |
| 0,370 | 0,839 | 0 Sense -> Samen          |
| 1,444 | 1,553 | 1 Samen -> Salat          |
| 0,037 | 0,192 | 0 Salat -> Sehne          |
| 0,000 | 0,000 | 2 Sehne -> Sahne          |
| 0,333 | 0,784 | 0 Sahne -> schön          |
| 0,222 | 0,506 | 0 schön -> Scham          |
| 0,296 | 0,669 | 0 Scham -> Sonne          |

### VF34

|       |       |                      |
|-------|-------|----------------------|
| 1,926 | 1,567 | 0 Sonne -> See       |
| 0,407 | 1,010 | 0 See -> Suche       |
| 0,370 | 0,688 | 0 Suche -> Socke     |
| 0,037 | 0,192 | 0 Socke -> Schwur    |
| 0,074 | 0,385 | 1 Schwur -> Schwein  |
| 1,630 | 1,644 | 0 Schwein -> Stachel |
| 0,111 | 0,424 | 0 Stachel -> Sirup   |
| 1,185 | 1,331 | 0 Sirup -> Sahne     |
| 0,074 | 0,385 | 0 Sahne -> Stuhl     |

|       |       |                                   |
|-------|-------|-----------------------------------|
| 1,704 | 1,382 | 0 Stuhl -> Schrank                |
| 0,815 | 1,241 | 0 Schrank -> Steckdose            |
| 0,259 | 0,656 | 0 Steckdose -> Säule              |
| 0,185 | 0,396 | 0 Säule -> Sache                  |
| 0,333 | 0,832 | 0 Sache -> Sieg                   |
| 0,407 | 0,888 | 0 Sieg -> Sorge                   |
| 0,222 | 0,698 | 0 Sorge -> Super                  |
| 0,148 | 0,602 | 0 Super -> Sprachunterricht       |
| 0,037 | 0,192 | 0 Sprachunterricht -> Strichjunge |
| 0,148 | 0,456 | 1 Strichjunge -> Statistik        |
| 0,259 | 0,594 | 1 Statistik -> Stolperstein       |
| 0,222 | 0,641 | 0 Stolperstein -> Systematik      |
| 0,222 | 0,577 | 0 Systematik -> Schulden          |
| 0,037 | 0,192 | 0 Schulden -> Silhouette          |
| 0,148 | 0,362 | 0 Silhouette -> Seeräuber         |
| 0,111 | 0,424 | 0 Seeräuber -> Spardose           |
| 0,111 | 0,424 | 1 Spardose -> Speck               |
| 0,000 | 0,000 | 1 Speck -> Sprung                 |
| 0,000 | 0,000 | 1 Sprung -> Spruch                |
| 0,148 | 0,456 | 1 Spruch -> Spaziergang           |
| 0,000 | 0,000 | 1 Spaziergang -> Spiegelei        |
| 0,000 | 0,000 | 1 Spiegelei -> Spielregel         |
| 0,037 | 0,192 | 1 Spielregel -> Spaghetti         |
| 0,074 | 0,385 | 0 Spaghetti -> Stoff              |
| 0,148 | 0,456 | 1 Stoff -> Strategie              |
| 0,444 | 0,892 | 1 Strategie -> Stetigkeit         |
| 2,296 | 1,540 | 1 Stetigkeit -> Stabilität        |

VF35

|       |       |                                 |
|-------|-------|---------------------------------|
| 0,444 | 1,050 | 0 Schlange -> Stern             |
| 3,111 | 1,155 | 0 Stern -> Sonne                |
| 0,259 | 0,594 | 0 Sonne -> Sesam                |
| 0,074 | 0,267 | 0 Sesam -> Subkultur            |
| 0,704 | 1,068 | 0 Subkultur -> Straße           |
| 0,111 | 0,424 | 0 Straße -> Segel               |
| 0,037 | 0,192 | 0 Segel -> Schnecke             |
| 0,000 | 0,000 | 0 Schnecke -> Schwedeneis       |
| 0,630 | 0,967 | 0 Schwedeneis -> Schnee         |
| 0,148 | 0,456 | 0 Schnee -> Stuhl               |
| 0,074 | 0,385 | 0 Stuhl -> Solarenergie         |
| 0,148 | 0,362 | 0 Solarenergie -> Schnellstraße |
| 0,185 | 0,786 | 0 Schnellstraße -> schön        |
| 0,667 | 1,074 | 0 schön -> satt                 |
| 0,407 | 0,971 | 0 satt -> Sinn                  |
| 0,037 | 0,192 | 0 Sinn -> Samen                 |
| 1,370 | 1,334 | 1 Samen -> Salat                |
| 0,148 | 0,456 | 0 Salat -> Suche                |
| 1,222 | 1,155 | 0 Suche -> sehen                |
| 0,333 | 0,784 | 0 sehen -> schneiden            |
| 0,370 | 0,742 | 0 schneiden -> Sisal            |

|       |       |                       |
|-------|-------|-----------------------|
| 0,000 | 0,000 | 0 Sisal -> Schmarrn   |
| 0,593 | 1,118 | 1 Schmarrn -> Schmand |
| 0,000 | 0,000 | 0 Schmand -> schnell  |

VF36

|       |       |                                 |
|-------|-------|---------------------------------|
| 0,074 | 0,385 | 0 Stuhl -> Sieb                 |
| 0,037 | 0,192 | 0 Sieb -> Stern                 |
| 0,074 | 0,267 | 0 Stern -> Sumpf                |
| 0,037 | 0,192 | 0 Sumpf -> Schlaf               |
| 0,074 | 0,267 | 0 Schlaf -> Sau                 |
| 3,889 | 0,320 | 0 Sau -> Schwein                |
| 0,519 | 1,014 | 0 Schwein -> Schäfer            |
| 0,185 | 0,681 | 0 Schäfer -> Säugling           |
| 1,741 | 1,723 | 0 Säugling -> Saugglocke        |
| 0,000 | 0,000 | 0 Saugglocke -> Säbelzähntiger  |
| 0,000 | 0,000 | 0 Säbelzähntiger -> Stadt       |
| 0,148 | 0,456 | 0 Stadt -> Satan                |
| 0,074 | 0,267 | 0 Satan -> Schuh                |
| 0,259 | 0,594 | 0 Schuh -> Säufer               |
| 0,778 | 1,013 | 0 Säufer -> Sarg                |
| 0,074 | 0,267 | 0 Sarg -> Sonne                 |
| 0,000 | 0,000 | 0 Sonne -> Stufe                |
| 0,185 | 0,396 | 0 Stufe -> Salamander           |
| 0,000 | 0,000 | 0 Salamander -> Socke           |
| 0,148 | 0,456 | 0 Socke -> Ständer              |
| 0,259 | 0,656 | 0 Ständer -> Sofa               |
| 0,074 | 0,267 | 0 Sofa -> Schnürsenkel          |
| 0,000 | 0,000 | 0 Schnürsenkel -> Siebbeinzelle |

VF37

|       |       |                         |
|-------|-------|-------------------------|
| 0,556 | 0,934 | 0 Stadt -> Symbol       |
| 0,259 | 0,526 | 0 Symbol -> Serie       |
| 0,037 | 0,192 | 0 Serie -> Saft         |
| 0,296 | 0,609 | 0 Saft -> Stiel         |
| 0,148 | 0,534 | 1 Stiel -> Stand        |
| 0,407 | 0,844 | 1 Stand -> Stiftung     |
| 0,407 | 0,844 | 1 Stiftung -> streng    |
| 0,593 | 1,047 | 0 streng -> Soll        |
| 0,370 | 0,839 | 0 Soll -> sind          |
| 0,074 | 0,385 | 0 sind -> See           |
| 0,407 | 1,083 | 0 See -> super          |
| 0,185 | 0,786 | 0 super -> Schornstein  |
| 1,370 | 1,334 | 0 Schornstein -> Schiff |
| 0,074 | 0,267 | 0 Schiff -> Schärpe     |
| 0,370 | 0,742 | 0 Schärpe -> Scheitel   |
| 0,148 | 0,602 | 0 Scheitel -> Sport     |
| 0,111 | 0,424 | 1 Sport -> Spast        |
| 0,074 | 0,385 | 1 Spast -> Spiel        |
| 0,037 | 0,192 | 1 Spiel -> Spange       |
| 0,111 | 0,320 | 3 Spange -> Stange      |

|       |       |                        |
|-------|-------|------------------------|
| 0,037 | 0,192 | 0 Stange -> Sarg       |
| 0,593 | 1,118 | 1 Sarg -> Saal         |
| 0,074 | 0,385 | 1 Saal -> Sand         |
| 0,185 | 0,557 | 0 Sand -> Sirene       |
| 0,296 | 0,724 | 0 Sirene -> Sarg       |
| 0,444 | 0,801 | 0 Sarg -> Spannung     |
| 0,222 | 0,698 | 0 Spannung -> Single   |
| 0,074 | 0,267 | 0 Single -> setzen     |
| 0,222 | 0,506 | 0 setzen -> singen     |
| 1,704 | 1,235 | 0 singen -> sagen      |
| 0,185 | 0,622 | 0 sagen -> springen    |
| 0,074 | 0,385 | 0 springen -> schlafen |
| 0,148 | 0,456 | 1 schlafen -> schlagen |

### VF38

|       |       |                               |
|-------|-------|-------------------------------|
| 2,259 | 1,534 | 0 Sauce -> Suppe              |
| 0,000 | 0,000 | 1 Suppe -> Supraleiter        |
| 0,037 | 0,192 | 0 Supraleiter -> Semikolon    |
| 0,000 | 0,000 | 0 Semikolon -> Samen          |
| 0,556 | 0,847 | 0 Samen -> Singvogel          |
| 0,148 | 0,602 | 0 Singvogel -> Sekundenkleber |
| 0,111 | 0,320 | 1 Sekundenkleber -> Selter    |
| 2,074 | 1,385 | 0 Selter -> Saft              |
| 0,222 | 0,698 | 0 Saft -> Schwein             |
| 1,074 | 1,174 | 0 Schwein -> Schnecke         |
| 0,259 | 0,656 | 0 Schnecke -> Schubkarre      |
| 0,259 | 0,859 | 0 Schubkarre -> Stelze        |
| 0,111 | 0,577 | 0 Stelze -> Sandpapier        |
| 0,111 | 0,424 | 0 Sandpapier -> Symmetrie     |
| 0,037 | 0,192 | 0 Symmetrie -> Säbelzähntiger |
| 0,185 | 0,622 | 0 Säbelzähntiger -> Sumpf     |
| 1,741 | 1,631 | 0 Sumpf -> Schildkröte        |
| 0,185 | 0,557 | 0 Schildkröte -> Sieg         |
| 0,741 | 1,095 | 0 Sieg -> Schande             |
| 0,259 | 0,712 | 1 Schande -> Schein           |

### VF39

|       |       |                            |
|-------|-------|----------------------------|
| 0,037 | 0,192 | 1 Schaf -> schade          |
| 0,037 | 0,192 | 0 schade -> Schlauch       |
| 0,222 | 0,506 | 3 Schlauch -> Strauch      |
| 0,000 | 0,000 | 0 Strauch -> Schieber      |
| 0,370 | 0,967 | 0 Schieber -> Schuljunge   |
| 0,259 | 0,594 | 1 Schuljunge -> Schuster   |
| 0,037 | 0,192 | 0 Schuster -> Schlumpf     |
| 0,000 | 0,000 | 0 Schlumpf -> Schach       |
| 0,222 | 0,641 | 1 Schach -> Schaubühne     |
| 0,074 | 0,385 | 0 Schaubühne -> Schokolade |
| 0,222 | 0,506 | 0 Schokolade -> Süden      |
| 1,074 | 1,299 | 0 Süden -> Schifffahrt     |
| 0,259 | 0,656 | 0 Schifffahrt -> sauber    |

|       |       |                    |
|-------|-------|--------------------|
| 0,037 | 0,192 | 0 sauber -> schade |
| 0,185 | 0,483 | 0 schade -> Schund |
| 0,037 | 0,192 | 0 Schund -> Schlaf |
| 0,852 | 1,199 | 0 Schlaf -> Sand   |
| 0,481 | 0,893 | 1 Sand -> sauber   |
| 0,111 | 0,320 | 1 sauber -> Sack   |
| 0,481 | 1,014 | 0 Sack -> Strolch  |
| 0,444 | 1,050 | 0 Strolch -> Seil  |
| 0,074 | 0,267 | 0 Seil -> Sole     |
| 0,074 | 0,385 | 0 Sole -> sachte   |

VF40

|       |       |                            |
|-------|-------|----------------------------|
| 0,556 | 0,934 | 0 Schwanz -> Seil          |
| 0,111 | 0,424 | 1 Seil -> Seife            |
| 0,222 | 0,641 | 0 Seife -> Serie           |
| 0,074 | 0,267 | 0 Serie -> Seide           |
| 0,370 | 0,967 | 1 Seide -> Saal            |
| 0,407 | 0,844 | 1 Saal -> sauber           |
| 0,926 | 1,269 | 0 sauber -> seriös         |
| 0,556 | 0,974 | 0 seriös -> schön          |
| 0,704 | 1,103 | 0 schön -> Sofa            |
| 3,370 | 0,792 | 0 Sofa -> Sessel           |
| 0,148 | 0,456 | 0 Sessel -> schlank        |
| 2,111 | 1,502 | 0 schlank -> sexy          |
| 0,148 | 0,602 | 0 sexy -> Sprudel          |
| 0,185 | 0,622 | 0 Sprudel -> super         |
| 0,519 | 1,221 | 0 super -> Sahne           |
| 0,074 | 0,267 | 0 Sahne -> Stuhl           |
| 0,037 | 0,192 | 0 Stuhl -> selten          |
| 0,074 | 0,267 | 0 selten -> Seife          |
| 0,481 | 0,935 | 0 Seife -> Schrank         |
| 0,000 | 0,000 | 0 Schrank -> Stimmung      |
| 0,074 | 0,385 | 0 Stimmung -> Schreibstift |

VF41

|       |       |                       |
|-------|-------|-----------------------|
| 0,852 | 1,406 | 0 schneiden -> Schale |
| 0,148 | 0,534 | 0 Schale -> Seil      |
| 0,037 | 0,192 | 1 Seil -> Salamander  |
| 0,074 | 0,267 | 1 Salamander -> Salz  |
| 0,148 | 0,602 | 0 Salz -> Schere      |
| 0,148 | 0,602 | 0 Schere -> Schatz    |
| 0,185 | 0,557 | 0 Schatz -> Schonung  |
| 0,259 | 0,656 | 0 Schonung -> Schule  |
| 0,185 | 0,396 | 0 Schule -> Schal     |
| 0,111 | 0,320 | 1 Schal -> Schande    |
| 0,111 | 0,320 | 0 Schande -> Schiff   |
| 1,074 | 1,269 | 0 Schiff -> Scholle   |
| 0,074 | 0,267 | 0 Scholle -> Schein   |
| 0,111 | 0,320 | 0 Schein -> Schelle   |
| 0,778 | 1,155 | 0 Schelle -> Spiel    |

|       |       |                         |
|-------|-------|-------------------------|
| 0,407 | 0,747 | 1 Spiel -> Spitze       |
| 0,333 | 0,832 | 1 Spitze -> Spange      |
| 0,074 | 0,385 | 1 Spange -> sprengen    |
| 0,037 | 0,192 | 1 sprengen -> Spaghetti |
| 0,185 | 0,786 | 0 Spaghetti -> Satz     |
| 1,148 | 1,562 | 0 Satz -> setzen        |
| 0,519 | 1,189 | 1 setzen -> Senke       |
| 0,037 | 0,192 | 1 Senke -> sengen       |
| 0,000 | 0,000 | 2 sengen -> singen      |
| 0,778 | 1,121 | 0 singen -> Sekt        |
| 0,296 | 0,775 | 0 Sekt -> Schuhe        |
| 0,037 | 0,192 | 0 Schuhe -> Spritze     |

VF42

|       |       |                          |
|-------|-------|--------------------------|
| 0,037 | 0,192 | 1 Satz -> Salz           |
| 0,259 | 0,712 | 1 Salz -> Seife          |
| 0,037 | 0,192 | 0 Seife -> sieben        |
| 0,148 | 0,770 | 0 sieben -> Süden        |
| 0,037 | 0,192 | 0 Süden -> sauber        |
| 0,444 | 0,801 | 0 sauber -> sehen        |
| 0,222 | 0,577 | 1 sehen -> sehr          |
| 0,148 | 0,602 | 0 sehr -> Sache          |
| 0,037 | 0,192 | 0 Sache -> siechen       |
| 0,000 | 0,000 | 0 siechen -> Senf        |
| 0,077 | 0,272 | 0 Senf -> so             |
| 0,148 | 0,456 | 1 so -> Sonntag          |
| 0,519 | 0,893 | 0 Sonntag -> sitzen      |
| 1,074 | 1,107 | 0 sitzen -> Stein        |
| 0,259 | 0,813 | 1 Stein -> Stiel         |
| 0,074 | 0,267 | 1 Stiel -> Stiefel       |
| 0,037 | 0,192 | 1 Stiefel -> Stern       |
| 0,037 | 0,192 | 1 Stern -> Strumpf       |
| 0,037 | 0,192 | 1 Strumpf -> Streichholz |
| 0,370 | 0,926 | 1 Streichholz -> Ständer |
| 0,037 | 0,192 | 1 Ständer -> Stimme      |
| 0,148 | 0,602 | 1 Stimme -> Steuer       |
| 0,037 | 0,192 | 1 Steuer -> Strauch      |
| 0,148 | 0,456 | 1 Strauch -> strecken    |
| 0,370 | 1,006 | 0 strecken -> Saft       |
| 0,037 | 0,192 | 0 Saft -> Schirm         |
| 0,407 | 0,747 | 0 Schirm -> Schädel      |
| 0,111 | 0,424 | 0 Schädel -> schleifen   |
| 1,333 | 1,074 | 0 schleifen -> schmieren |
| 0,185 | 0,622 | 0 schmieren -> Stecker   |
| 0,185 | 0,622 | 0 Stecker -> sachte      |
| 0,296 | 0,823 | 1 sachte -> sagen        |
| 0,222 | 0,577 | 0 sagen -> Stirn         |
| 0,000 | 0,000 | 1 Stirn -> Stängel       |
| 0,259 | 0,712 | 1 Stängel -> stumpf      |
| 0,111 | 0,424 | 1 stumpf -> Stand        |



|       |       |                    |
|-------|-------|--------------------|
| 0,407 | 0,844 | 0 Stand -> suchen  |
| 0,185 | 0,622 | 0 suchen -> singen |
